# Supplementary material for: Globally widespread and increasing violations of environmental flow envelopes
Source: Copernicus journal article supplement (doi:10.5194/hess-26-3315-2022), 2022-07-01
Supplement: Supplementary file 1 [file hess-26-3315-2022-supplement.zip]

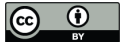

*Supplement of*

**Globally widespread and increasing violations of environmental flow envelopes**

**Vili Virkki et al.**

*Correspondence to:* Vili Virkki (vili.virkki@aalto.fi) and Matti Kummu (matti.kummu@aalto.fi)

- hess-26-3315-2022-supplement-title-page.pdf
- fig3\_a\_to\_c\_data.csv
- fig3\_d\_to\_f\_data.csv
- hess\_2021\_260\_Virkki\_et\_al\_supplementary\_figures.pdf
- hybas\_lev05.gpkg

The copyright of individual parts of the supplement might differ from the article licence.
